# Supplementary material for: Arabidopsis in the Wild—The Effect of Seasons on Seed Performance
Source: MDPI journal article supplement (doi:10.3390/plants9050576), 2020-05-01
Supplement: s1 [file s1]

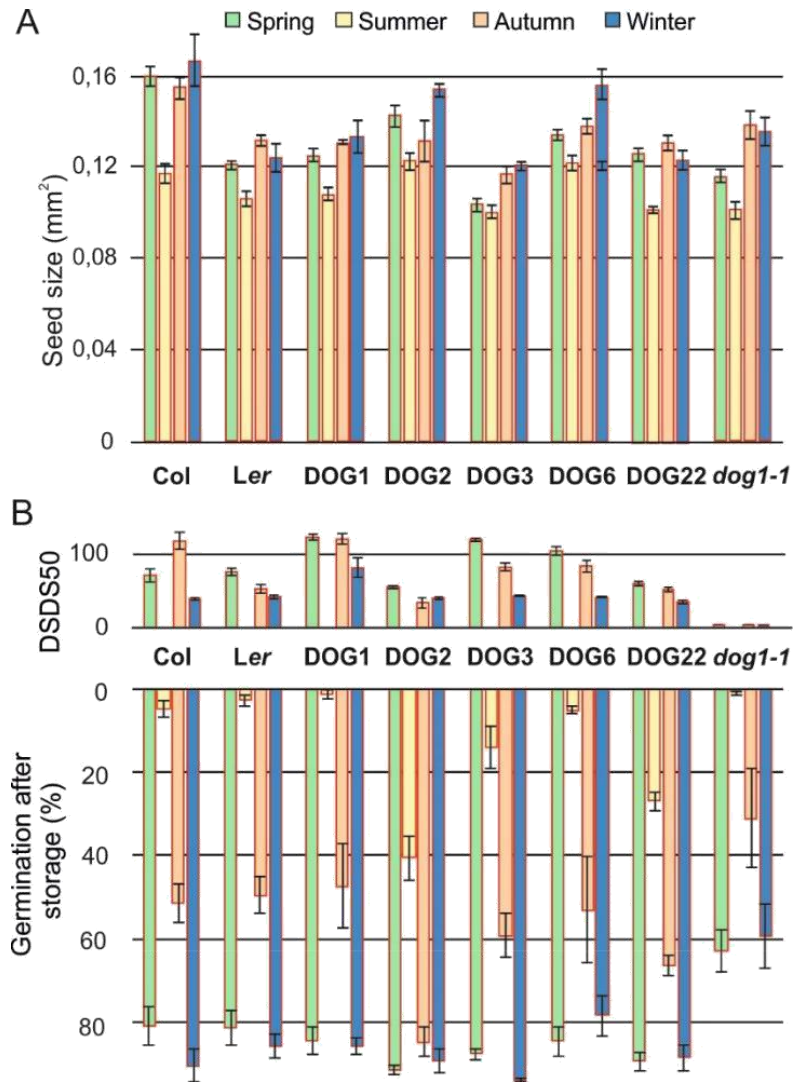

**Figure S1.** Seed performance of the individual genotypes over four season. (A) Seed size (mm<sup>2</sup>), (B) Seed Dormancy (DSDS50) and seed germination after storage (longevity) levels for each genotype for all seasons of 2014. Averages of four replicates are displayed. Error bars represent standard errors.

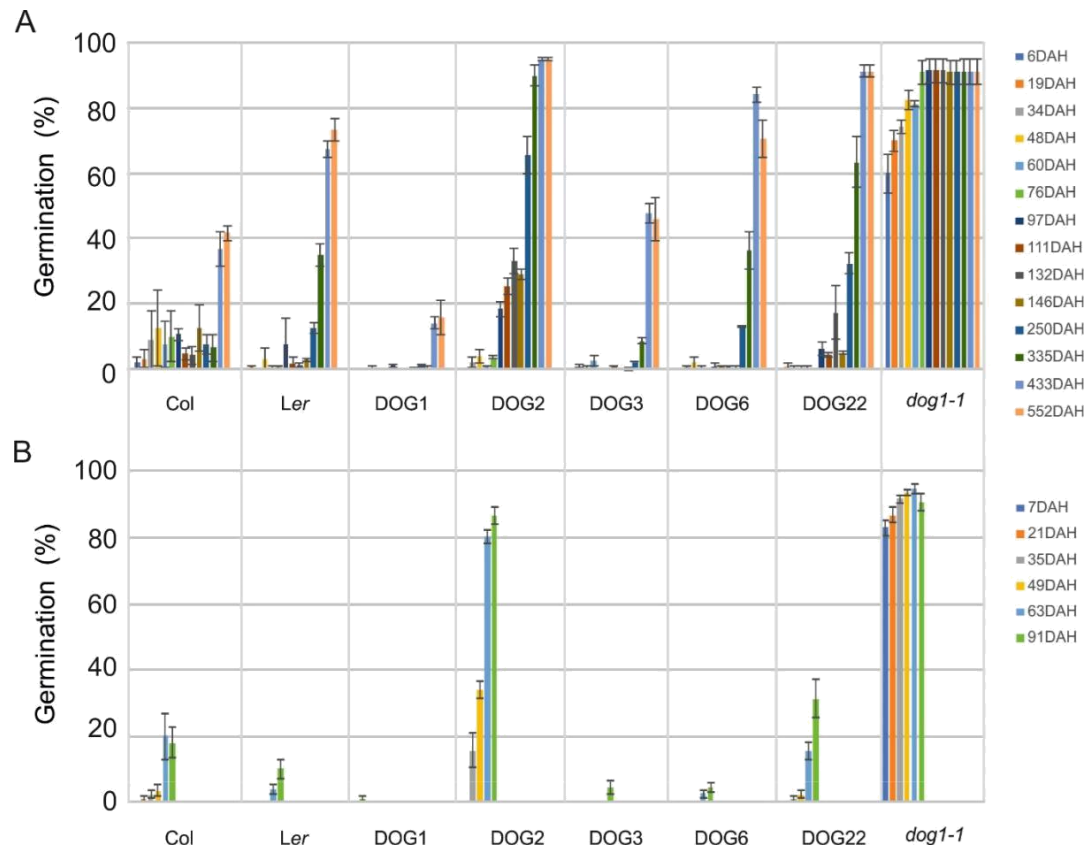

**Figure S2.** After-ripening requirement for seeds of the summer experiments. **(A)** Seeds produced in 2012. Release of dormancy was followed until 552 Days After Harvest (DAH) at which most lines reach over 50% of germination. **(B)** Seed produced in 2014. Release of dormancy was followed until 91 DAH. Averages of four replicates are displayed. Error bars represent standard errors.

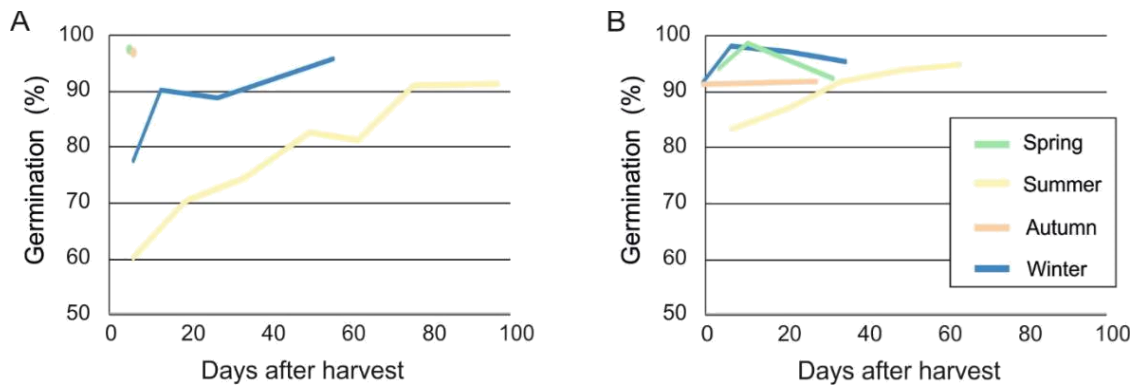

**Figure S3.** After-ripening requirement for *dog1-1* seeds produced in all seasons of 2012 and 2014. **(A)** Seeds produced in 2012. **(B)** Seed produced in 2014. Release of dormancy was followed until 91 DAH. Release of dormancy was followed until seeds reached over 90% germination. Averages of four replicates are displayed.
